# Supplementary material for: Changes of Plasma Analytes Reflecting Metabolic Adaptation to the Different Stages of the Lactation Cycle in Healthy Multiparous Holstein Dairy Cows Raised in High-Welfare Conditions
Source: MDPI journal article supplement (doi:10.3390/ani11061714), 2021-06-08
Supplement: s1 [file s1]

# Supplementary Materials: Changes of Plasma Analytes Reflecting Metabolic Adaptation to the Different Stages of the Lactation Cycle in Healthy Multiparous Holstein Dairy Cows Raised in High-Welfare Conditions

Michele Premi <sup>†</sup>, Matteo Mezzetti <sup>†</sup>, Giulia Ferronato, Mario Barbato, Fiorenzo Piccioli Cappelli, Andrea Minuti and Erminio Trevisi <sup>\*</sup>

**Table S1.** Diet used during the dry phase in the 11 high welfare farms included in the study.

| Item, % dm                                     | Farm  |       |       |       |       |       |       |       |       |       |       |
|------------------------------------------------|-------|-------|-------|-------|-------|-------|-------|-------|-------|-------|-------|
|                                                | 1     | 2     | 3     | 4     | 5     | 6     | 7     | 8     | 9     | 10    | 11    |
| Corn silage                                    | 58.50 | -     | -     | -     | -     | 52.94 | 31.49 | -     | -     | 33.33 | -     |
| Sorghum silage                                 | -     | -     | -     | -     | -     | -     | -     | 26.61 | -     | -     | -     |
| Ryegrass hay                                   | -     | 37.50 | 66.67 | 50.85 | -     | -     | -     | 47.15 | -     | -     | 81.25 |
| Wheat silage                                   | 13.93 | -     | -     | 16.95 | 68.75 | -     | -     | -     | 68.75 | 42.00 | -     |
| Straw                                          | 13.93 | 37.50 | -     | 12.71 | -     | 29.41 | 43.49 | 14.14 | -     | 13.33 | -     |
| Corn grain ground                              | 6.69  | 12.50 | -     | 4.24  | 6.25  | -     | 2.00  | -     | 6.25  | -     | -     |
| Soybean meal                                   | 5.01  | -     | -     | 10.17 | 6.25  | -     | 10.00 | 5.53  | 6.25  | -     | -     |
| Sunflower meal                                 | -     | -     | -     | -     | -     | -     | 2.54  | 5.78  | -     | 10.67 | -     |
| Wheat meal                                     | -     | -     | -     | -     | -     | -     | 9.48  | -     | -     | -     | -     |
| Molasses beet                                  | -     | -     | -     | 4.24  | -     | -     | -     | -     | -     | -     | -     |
| Supplement                                     | 1.95  | -     | -     | 0.85  | -     | -     | 1.00  | 0.79  | -     | -     | -     |
| Concentrate <sup>1</sup>                       | -     | 12.50 | 33.33 | -     | 18.75 | 17.65 | -     | -     | 18.75 | 0.67  | 18.75 |
| <b>Nutrient composition, unit <sup>2</sup></b> |       |       |       |       |       |       |       |       |       |       |       |
| ENI, Mcal/kg dm                                | 12.60 | 9.60  | 10.79 | 13.14 | 12.20 | 9.20  | 11.51 | 12.50 | 11.70 | 11.24 | 11.56 |
| CP, % dm                                       | 28.06 | 21.82 | 23.60 | 26.02 | 27.19 | 24.87 | 21.41 | 19.00 | 24.25 | 18.28 | 22.80 |
| NSC, % dm                                      | 49.80 | 57.05 | 50.20 | 49.75 | 47.11 | 55.15 | 58.68 | 56.00 | 50.73 | 57.60 | 52.20 |
| NDF, % dm                                      | 58.50 | -     | -     | -     | -     | 52.94 | 31.49 | -     | -     | 33.33 | -     |

<sup>1</sup> For farms 2, 3, 6 and 10 the analytical components (% dm) of the concentrate were: CP 26.0%, ether extract 1.3%, crude fiber 10.0%, ash 15.4%. For farms 5 and 11 the analytical components (% dm) of the concentrate were: CP 16.8%, ether extract 2.5%, crude fiber 4.5%, ash 18.5%. For farm 9 the analytical components (% dm) of the concentrate were: CP 20.0%, ether extract 4.0%, crude fiber 8.2%, ash 16.4%. <sup>2</sup> ENI is Net energy for lactation; CP is crude protein, NSC is non starch carbohydrates, NDF is neutral detergent fiber.

**Table S2.** Diet used during the postpartum and early lactation phases in the 11 high welfare farms included in the study.

| Item, % dm                                     | Farm  |       |       |       |       |       |       |       |       |       |       |
|------------------------------------------------|-------|-------|-------|-------|-------|-------|-------|-------|-------|-------|-------|
|                                                | 1     | 2     | 3     | 4     | 5     | 6     | 7     | 8     | 9     | 10    | 11    |
| Corn silage                                    | 39.82 | 55.98 | 48.05 | 57.27 | 42.21 | 55.17 | 32.94 | 12.42 | 56.20 | 56.51 | 56.30 |
| Sorghum silage                                 | -     | -     | -     | -     | -     | -     | -     | 24.60 | -     | -     | -     |
| Wheat silage                                   | 16.59 | -     | -     | -     | 12.99 | -     | 9.49  | -     | -     | -     | -     |
| Ryegrass silage                                | -     | 5.60  | 11.44 | -     | -     | -     | -     | -     | -     | -     | 11.02 |
| Alfalfa silage                                 | -     | -     | -     | 5.73  | -     | -     | -     | -     | 6.10  | -     | -     |
| Corn high moisture                             | 8.85  | -     | -     | 9.16  | 13.85 | -     | -     | -     | -     | -     | 13.46 |
| Alfalfa hay                                    | 7.74  | 7.63  | -     | 4.58  | 4.33  | 6.60  | 11.48 | 20.98 | 3.41  | 7.37  | 4.90  |
| Ryegrass hay                                   | -     | 2.54  | 4.35  | 2.29  | -     | 6.60  | -     | 2.12  | 7.05  | 6.14  | -     |
| Straw                                          | -     | -     | -     | 2.29  | 1.52  | -     | -     | -     | -     | -     | -     |
| Corn grain ground                              | 7.74  | 10.43 | 13.27 | 4.58  | 7.14  | 12.30 | 21.16 | 12.62 | 14.09 | 5.41  | 4.16  |
| Barley grain ground                            | -     | -     | -     | -     | -     | -     | -     | 8.41  | -     | -     | -     |
| Soybean meal                                   | 7.96  | -     | -     | 6.19  | 6.06  | 10.30 | 10.65 | 12.10 | -     | -     | 6.85  |
| Sunflower meal                                 | -     | -     | -     | -     | -     | -     | 4.43  | 4.34  | -     | 2.95  | -     |
| Extruded linseed                               | 1.11  | -     | -     | -     | -     | -     | -     | -     | -     | -     | -     |
| Soybean                                        | -     | -     | -     | 2.98  | -     | 2.60  | 3.32  | -     | -     | -     | -     |
| Cotton                                         | -     | -     | -     | -     | 3.25  | -     | -     | -     | -     | -     | -     |
| Wheat meal                                     | -     | -     | -     | -     | -     | -     | 4.32  | -     | -     | -     | -     |
| Hydrogenated fat                               | -     | -     | -     | 0.57  | -     | -     | 0.52  | 0.78  | -     | -     | 0.73  |
| Molasses beet                                  | -     | -     | 0.23  | 3.44  | 2.16  | -     | -     | -     | -     | -     | -     |
| Supplement                                     | -     | -     | -     | 0.92  | -     | -     | 1.69  | 1.63  | -     | 1.23  | 2.6   |
| Concentrate <sup>1</sup>                       | 10.18 | 17.81 | 22.65 | -     | 6.50  | 6.40  | -     | -     | 13.18 | 20.40 | -     |
| <b>Nutrient composition, unit <sup>2</sup></b> |       |       |       |       |       |       |       |       |       |       |       |
| ENI, Mcal/kg dm                                | 1.53  | 1.64  | 1.66  | 1.54  | 1.61  | 1.54  | 1.53  | 1.55  | 1.62  | 1.51  | 1.62  |
| CP, % dm                                       | 16.7  | 16.2  | 17.0  | 15.8  | 16.4  | 16.9  | 16.3  | 16.5  | 15.8  | 16.8  | 15.1  |
| NSC, % dm                                      | 42.0  | 44.0  | 37.5  | 41.3  | 41.2  | 39.2  | 43.1  | 36.8  | 40.3  | 38.0  | 38.2  |
| NDF, % dm                                      | 30.7  | 31.8  | 35.6  | 30.8  | 31.0  | 32.4  | 32.9  | 35.8  | 33.8  | 34.7  | 36.9  |

<sup>1</sup> For farm 1 the analytical components (% dm) of the concentrate were: CP 30.0%, ether extract 2.2%, crude fiber 4.5%, ash 6.5%. For farms 2, 6, 9 and 10 the analytical components (% dm) of the concentrate were: CP 31.5%, ether extract 9.8%, crude fiber 11.8%, ash 7.0%. For farm 3 the analytical components (% dm) of the concentrate were: CP 24.0%, ether extract 7.0%, crude fiber 16.0%, ash 9.5%. For farm 5 the analytical components (% dm) of the concentrate were: CP 24.5%, ether extract 10.5%, crude fiber 11.0%, ash 18.0%. <sup>2</sup> ENI is Net energy for lactation; CP is crude protein, NSC is non starch carbohydrates, NDF is neutral detergent fiber.

**Table S3.** Diet used during the late lactation phase in the 11 high welfare farms included in the study.

| Item, % dm                                     | Farm  |       |       |       |       |       |       |       |       |       |       |
|------------------------------------------------|-------|-------|-------|-------|-------|-------|-------|-------|-------|-------|-------|
|                                                | 1     | 2     | 3     | 4     | 5     | 6     | 7     | 8     | 9     | 10    | 11    |
| Corn silage                                    | 50.31 | 55.98 | 51.68 | 60.10 | 42.21 | 55.17 | 32.94 | 12.42 | 56.20 | 56.51 | 56.30 |
| Sorghum silage                                 | -     | -     | -     | -     | -     | -     | -     | 24.60 | -     | -     | -     |
| Wheat silage                                   | 12.58 | -     | -     | -     | 12.99 | -     | 9.49  | -     | -     | -     | -     |
| Ryegrass silage                                | -     | 5.60  | 12.92 | -     | -     | -     | -     | -     | -     | -     | 11.02 |
| Alfalfa silage                                 | -     | -     | -     | 6.01  | -     | -     | -     | -     | 6.10  | -     | -     |
| Corn high moisture                             | 10.48 | -     | -     | 7.21  | 13.85 | -     | -     | -     | -     | -     | 13.46 |
| Alfalfa hay                                    | 5.24  | 7.63  | -     | 6.01  | 4.33  | 6.60  | 11.48 | 20.98 | 3.41  | 7.37  | 4.90  |
| Ryegrass hay                                   | -     | 2.54  | -     | 3.61  | -     | 6.60  | -     | 2.12  | 7.05  | 6.14  | -     |
| Straw                                          | -     | -     | -     | 2.88  | 1.52  | -     | -     | -     | -     | -     | -     |
| Corn grain ground                              | 5.24  | 10.43 | 12.92 | 2.40  | 7.14  | 12.30 | 21.16 | 12.62 | 14.09 | 5.41  | 4.16  |
| Barley grain ground                            | -     | -     | -     | -     | -     | -     | -     | 8.41  | -     | -     | -     |
| Soybean meal                                   | 2.10  | -     | -     | 6.01  | 6.06  | 10.30 | 10.65 | 12.10 | -     | -     | 6.85  |
| Sunflower meal                                 | -     | -     | -     | -     | -     | -     | 4.43  | 4.34  | -     | 2.95  | -     |
| Extruded linseed                               | 1.05  | -     | -     | -     | -     | -     | -     | -     | -     | -     | -     |
| Soybean                                        | -     | -     | -     | 2.40  | -     | 2.60  | 3.32  | -     | -     | -     | -     |
| Cotton                                         | -     | -     | -     | -     | 3.25  | -     | -     | -     | -     | -     | -     |
| Wheat meal                                     | -     | -     | -     | -     | -     | -     | 4.32  | -     | -     | -     | -     |
| Hydrogenated fat                               | -     | -     | -     | -     | -     | -     | 0.52  | 0.78  | -     | -     | 0.73  |
| Molasses beet                                  | -     | -     | 0.26  | 2.40  | 2.16  | -     | -     | -     | -     | -     | -     |
| Supplement                                     | -     | -     | -     | 0.96  | -     | -     | 1.69  | 1.63  | -     | 1.23  | 2.6   |
| Concentrate <sup>1</sup>                       | 13.00 | 17.81 | 22.22 | -     | 6.50  | 6.40  | -     | -     | 13.18 | 20.40 | -     |
| <b>Nutrient composition, unit <sup>2</sup></b> |       |       |       |       |       |       |       |       |       |       |       |
| ENI, Mcal/kg dm                                | 1.50  | 1.64  | 1.59  | 1.52  | 1.61  | 1.54  | 1.53  | 1.55  | 1.62  | 1.51  | 1.62  |
| CP, % dm                                       | 14.0  | 16.2  | 16.3  | 15.5  | 16.4  | 16.9  | 16.3  | 16.5  | 15.8  | 16.8  | 15.1  |
| NSC, % dm                                      | 42.4  | 44.0  | 37.1  | 43.2  | 41.2  | 39.2  | 43.1  | 36.8  | 40.3  | 38.0  | 38.2  |
| NDF, % dm                                      | 32.8  | 31.8  | 36.7  | 33.6  | 31.0  | 32.4  | 32.9  | 35.8  | 33.8  | 34.7  | 36.9  |

<sup>1</sup> For farm 1 the analytical components (% dm) of the concentrate were: CP 30.0%, ether extract 2.2%, crude fiber 4.5%, ash 6.5%. For farms 2, 6, 9 and 10 the analytical components (% dm) of the concentrate were: CP 31.5%, ether extract 9.8%, crude fiber 11.8%, ash 7.0%. For farm 3 the analytical components (% dm) of the concentrate were: CP 24.0%, ether extract 7.0%, crude fiber 16.0%, ash 9.5%. For farm 5 the analytical components (% dm) of the concentrate were: CP 24.5%, ether extract 10.5%, crude fiber 11.0%, ash 18.0%. <sup>2</sup> ENI is Net energy for lactation; CP is crude protein, NSC is non starch carbohydrates, NDF is neutral detergent fiber.

**Table S4.** Intra- and inter-assay coefficient of variations, limit of quantification (LOQ), codes of commercial kits used, references for their validation in the bovine plasma, calibrators and quality controls used for plasma parameters included in the study.

| Parameter, unit <sup>10</sup> | Intra | Inter | LOQ  | Kit                           | Reference | Calibrator                                                           | Quality control                                                                                      |
|-------------------------------|-------|-------|------|-------------------------------|-----------|----------------------------------------------------------------------|------------------------------------------------------------------------------------------------------|
| Glucose, mmol/L               | 1.33  | 0.75  | 0.1  | 182508401                     | -         | Homemade bovine standard                                             | Homemade bovine standard;<br>SeraChem Control Level 1,<br>00181624121;<br>Bov Asy Control 2, AN10263 |
| Fructosamine, mmol/L          | 0.9   | 5.33  | 15   | 7080                          | -         | Diagnostic Far Calibrator 7080s                                      | Diagnostic Far Control N+P,<br>7510                                                                  |
| NEFA, mmol/L                  | 2.27  | 5.00  | 0.01 | NEFA-HR(2) R1 Set, 434-917952 | -         | NEFA standard, 270-77000 <sup>2</sup>                                | Homemade bovine standard;<br>SeraChem Control Level 1,<br>00181624121;                               |
| BHB, mmol/L                   | 0.82  | 3.42  | 0.1  | RB10073                       | -         | BHB standard included in the kit                                     | Bov Asy Control 2, AN10263                                                                           |
| Triglycerides, mmol/L         | 0.84  | 3.44  | 0.02 | 18255640                      | -         | Homemade bovine standard                                             |                                                                                                      |
| Urea, mmol/L                  | 1.14  | 1.23  | 0.01 | 182554401                     | -         | Homemade bovine standard                                             |                                                                                                      |
| Ca, mmol/L                    | 0.93  | 1.86  | 0.2  | 182503401                     | -         | Homemade bovine standard                                             |                                                                                                      |
| P, mmol/L                     | 1.64  | 0.73  | 0.01 | 182512401                     | -         | Homemade bovine standard                                             |                                                                                                      |
| Mg, mmol/L                    | 1.00  | 1.65  | 0.02 | 182592401                     | -         | Homemade bovine standard                                             |                                                                                                      |
| Na, mmol/L                    | 0.62  | 1.53  | 50   | ISE Diluent, 00182534001;     | -         |                                                                      |                                                                                                      |
| K, mmol/L                     | 0.63  | 1.11  | 1.46 | ISE Reference, 00182535001    | -         | ISE low calibrator, 00184692001;<br>ISE high calibrator, 00184693001 | Homemade bovine standard;<br>SeraChem Control Level 1,<br>00181624121;                               |
| Cl, mmol/L                    | 0.34  | 0.77  | 70   | -                             | -         |                                                                      | Bov Asy Control 2, AN10263                                                                           |
| Zn, mmol/L                    | 1.76  | 3.83  | 0.5  | 439-149062                    | -         | Bov Asy Control 2 <sup>4</sup>                                       |                                                                                                      |
| Creatinine, µmol/L            | 1.09  | 3.09  | 18   | 182555401                     | -         | Homemade bovine standard                                             |                                                                                                      |
| Total bilirubin, µmol/L       | 3.11  | 2.46  | 2    | 182546401                     | -         | Bov Asy Control 2 <sup>4</sup>                                       |                                                                                                      |
| AST, U/L                      | 1.78  | 3.55  | 1    | 182575401                     | -         | No calibration is required                                           |                                                                                                      |
| GGT, U/L                      | 2.27  | 4.42  | 2    | 182576401                     | -         | No calibration is required                                           |                                                                                                      |
| ALP, U/L                      | 0.77  | 3.52  | 2    | 182596401                     | -         | ReferrIL E, 0018256300 <sup>1</sup>                                  |                                                                                                      |

|                       |      |      |      |           |       |                                                     |                                                                                                                                 |
|-----------------------|------|------|------|-----------|-------|-----------------------------------------------------|---------------------------------------------------------------------------------------------------------------------------------|
| Myeloperoxidase, U/L  | 1.83 | 8.60 | 10   | -         | [31]  | No calibration is required                          | Homemade bovine standard;<br>SeraChem Control Level 1,<br>00181624121                                                           |
| Total protein, g/L    | 1.07 | 2.87 | 10   | 182514401 | -     | Homemade bovine standard                            |                                                                                                                                 |
| Haptoglobin, g/L      | 3.64 | 3.50 | 0.01 | -         | [99]  | No calibration is required                          |                                                                                                                                 |
| Ceruloplasmin, µmol/L | 1.39 | 3.57 | 0.1  | -         | [100] | Human plasma ceruloplasmin,<br>A50143H <sup>6</sup> | Homemade bovine standard;<br>SeraChem Control Level 1,<br>00181624121;                                                          |
| Albumin, g/L          | 1.20 | 3.41 | 16   | 182500401 | -     | Homemade bovine standard                            | Bov Asy Control 2, AN10263                                                                                                      |
| Cholesterol, mmol/L   | 1.56 | 1.38 | 0.1  | 182505401 | -     | Homemade bovine standard                            |                                                                                                                                 |
| Retinol, µmol/L       | 2.72 | 2.70 | -    | -         |       | R7632                                               | Homemade bovine standard;                                                                                                       |
| Paraoxonase, U/mL     | 1.38 | 4.60 | 1.2  | -         | [101] | No calibration is required                          | Homemade bovine standard;<br>SeraChem Control Level 1,<br>00181624121;<br>Bov Asy Control 2, AN10263                            |
| Tocopherol, µmol/L    | 3.38 | 3.52 | -    | -         |       | T3251                                               |                                                                                                                                 |
| β-Carotene, µmol/L    | 5.55 | 6.32 | -    | -         |       | C4582                                               | Homemade bovine standard;                                                                                                       |
| FRAP, mmol/L          | 3.13 | 3.15 | 30   | -         | [91]  | TROLOX, 238813-1G <sup>8</sup>                      | Homemade bovine standard;<br>SeraChem Control Level 1,<br>00181624121;<br>Bov Asy Control 2, AN10263;<br>TROLOX, 238813-1G8     |
| Thiol groups, mmol/L  | 1.00 | 5.90 | 3.5  | MC433     | -     | Calibrator SHp, MC.0309                             | Homemade bovine standard;<br>SeraChem Control Level 1,<br>00181624121;<br>Bov Asy Control 2, AN10263<br>Calibrator SHp, MC.0309 |

|                                            |      |       |     |        |      |                                                   |                                                                                                                              |
|--------------------------------------------|------|-------|-----|--------|------|---------------------------------------------------|------------------------------------------------------------------------------------------------------------------------------|
| ROMt, mg H <sub>2</sub> O <sub>2</sub> /dL | 1.40 | 2.93  | 3.2 | MC0034 | -    | Calibrator d-ROMs, MC.030 <sup>9</sup>            | Homemade bovine standard<br>SeraChem Control Level 1,<br>00181624121;<br>Control Serum, MC0314;<br>Calibrator d-ROMs, MC0304 |
| AOPP, mmol/L                               | 0.42 | 10.93 | 10  | -      | [34] | Chloramine T trihydrate, 31224-250G <sup>10</sup> | Homemade bovine standard;<br>SeraChem Control Level 1,<br>00181624121;<br>Bov Asy Control 2, AN10263                         |

<sup>1</sup>Instrumentation Laboratory Werfen, Milano, Italy. <sup>2</sup>Wako Chemicals GmbH, Neuss, Germany. <sup>3</sup>Randox Laboratories Ltd., Crumlin, County Antrim, UK. <sup>4</sup>Diacron International S.r.l., Grosseto, Italy. <sup>5</sup>Megazyme, Wicklow, Ireland. <sup>6</sup>Meridian Life Science, Memphis, TN, USA. <sup>7</sup>Thermo Scientific, Frederick, MD, USA. <sup>8</sup>Sigma-Aldrich Chemie GmbH, Steinheim, Germany. <sup>9</sup>Carlo Erba, Rodano, Milano, Italy. <sup>10</sup>NEFA = non-esterified fatty acids, BHB =  $\beta$ -Hydroxybutyrate; AST = aspartate aminotransferase; GGT =  $\gamma$ -glutamyl transferase; ALP = alkaline phosphatase; FRAP = ferric reducing antioxidant power, ROMt = total reactive oxygen metabolites; AOPP = advanced oxidation product of protein.
